# Supplementary material for: Independent Tissue-Based Biomarkers in Endometrioid Endometrial Cancer: Tumor Budding in Microsatellite Instability and WHO Grading in Copy-Number-Low Patients
Source: MDPI journal article supplement (doi:10.3390/cancers15153832), 2023-07-28
Supplement: s1 [file s1]

## Supplementary tables

**Supplementary Table S1:** Metrics of the histomorphological parameters obtained in the TCGA study cohort.

|                        | median | interquartile range | mean | standard deviation | min | max  |
|------------------------|--------|---------------------|------|--------------------|-----|------|
| TB in 1 HPF            | 0.0    | 1.0                 | 0.7  | 1.3                | 0.0 | 9.0  |
| TB in 10 HPF           | 0.0    | 1.0                 | 1.3  | 2.9                | 0.0 | 20.0 |
| Minimal cell nest size | 8.0    | 13.3                | 13.0 | 15.0               | 1.0 | 95.0 |
| Tumor-stroma ratio     | 3.5    | 3.3                 | 4.1  | 2.5                | 0.4 | 19.0 |
| Inflammation           | 8.0    | 11.0                | 10.9 | 9.7                | 1.0 | 50.0 |

**Supplementary Table S2:** Cutoffs identified with “Cutoff Finder” [40] and dispersion of patients of the TCGA cohort according to the identified cutoffs.

|        | Grading   |            | TB in 1 HPF |      | TB in 10 HPF |      | Minimal cell nest size |      | TSR    |        | Inflammation |      | MELF   |         | Lymphovascular space invasion |         |
|--------|-----------|------------|-------------|------|--------------|------|------------------------|------|--------|--------|--------------|------|--------|---------|-------------------------------|---------|
|        | low grade | high grade | low         | high | low          | high | small                  | big  | low    | high   | low          | high | absent | present | absent                        | present |
| Cutoff | G1, G2    | G3         | 0-2         | ≥ 3  | 0-5          | ≥ 6  | 1                      | ≥ 2  | 0-1.38 | ≥ 1.38 | 0-32         | ≥ 33 | -      | -       | -                             | -       |
| n      | 167       | 61         | 208         | 20   | 210          | 18   | 36                     | 192  | 16     | 212    | 218          | 10   | 174    | 31      | 187                           | 41      |
| %      | 73.2      | 26.8       | 91.2        | 8.8  | 92.1         | 7.9  | 15.8                   | 84.2 | 7.0    | 93.0   | 95.6         | 4.4  | 84.9   | 15.1    | 82.0                          | 18.0    |

**Supplementary Table S3:** Correlations between each histomorphological parameter were calculated with a Fisher's exact test and resulting p-values are shown.

|                                                          | TB in 1 HPF<br>(low vs. high) | TB in 10 HPF<br>(low vs. high) | MCNS (low vs. high) | TSR (low vs. high) | Inflammation<br>(low vs. high) | MELF<br>(absent vs. present) | Lymphovascular<br>space invasion<br>(absent vs. present) | ITBCC grading<br>scheme (Bd1 vs. Bd2 vs. Bd3) |
|----------------------------------------------------------|-------------------------------|--------------------------------|---------------------|--------------------|--------------------------------|------------------------------|----------------------------------------------------------|-----------------------------------------------|
| TB in 1 HPF (low vs. high)                               |                               | <b>&lt;0.001</b>               | <b>&lt;0.001</b>    | 0.638              | > 0.999                        | 0.499                        | 0.061                                                    | <b>&lt;0.001</b>                              |
| TB in 10 HPF (low vs. high)                              |                               |                                | <b>&lt;0.001</b>    | > 0.999            | 0.568                          | 0.766                        | <b>0.006</b>                                             | <b>&lt;0.001</b>                              |
| MCNS (low vs. high)                                      |                               |                                |                     | 0.723              | > 0.999                        | 0.282                        | 0.055                                                    | <b>&lt;0.001</b>                              |
| TSR (low vs. high)                                       |                               |                                |                     |                    | 0.149                          | > 0.999                      | 0.175                                                    | 0.926                                         |
| Inflammation<br>(low vs. high)                           |                               |                                |                     |                    |                                | 0.628                        | 0.695                                                    | 0.714                                         |
| MELF (absent vs. present)                                |                               |                                |                     |                    |                                |                              | 0.322                                                    | <b>0.004</b>                                  |
| Lymphovascular<br>space invasion<br>(absent vs. present) |                               |                                |                     |                    |                                |                              |                                                          | <b>0.008</b>                                  |
| ITBCC grading<br>scheme (Bd1 vs. Bd2 vs. Bd3)            |                               |                                |                     |                    |                                |                              |                                                          |                                               |

**Supplementary Table S4:** Results for the Log-rank tests for disease-specific (DSS), overall survival (OS) and progression-free survival (PFS) for the whole TCGA cohort as well as for the MSI and CN-LOW subgroups.

|            |     | Grading<br>(low vs.<br>high) | TB in 1<br>HPF<br>(low vs.<br>high) | TB in 10 HPF<br>(low vs.<br>high) | MCNS<br>(low vs.<br>high) | TSR (low<br>vs. high) | Inflammati<br>on (low vs.<br>high) | MELF<br>(absent<br>vs.<br>present) | Lymphovascu<br>lar space<br>invasion<br>(absent vs.<br>present) | ITBCC grading<br>scheme (Bd1<br>vs. Bd2 vs. Bd3) |
|------------|-----|------------------------------|-------------------------------------|-----------------------------------|---------------------------|-----------------------|------------------------------------|------------------------------------|-----------------------------------------------------------------|--------------------------------------------------|
| TCGA       | DSS | <0.001                       | <0.001                              | <0.001                            | <0.001                    | 0.022                 | 0.276                              | 0.028                              | <0.001                                                          | <0.001                                           |
|            | OS  | <0.001                       | <0.001                              | <0.001                            | <0.001                    | 0.014                 | 0.077                              | 0.549                              | 0.078                                                           | <0.001                                           |
|            | PFS | 0.011                        | <0.001                              | 0.001                             | 0.066                     | 0.879                 | 0.813                              | 0.987                              | 0.034                                                           | 0.026                                            |
| MSI        | DSS | 0.007                        | <0.001                              | <0.001                            | 0.002                     | 0.004                 | 0.503                              | 0.014                              | 0.008                                                           | 0.001                                            |
|            | OS  | 0.067                        | <0.001                              | <0.001                            | <0.001                    | 0.034                 | 0.403                              | 0.217                              | 0.115                                                           | <0.001                                           |
|            | PFS | 0.045                        | <0.001                              | 0.007                             | 0.066                     | 0.334                 | 0.230                              | 0.258                              | 0.339                                                           | 0.064                                            |
| CN-<br>low | DSS | <0.001                       | 0.061                               | 0.043                             | 0.212                     | 0.735                 | <0.001                             | 0.666                              | 0.041                                                           | 0.168                                            |
|            | OS  | 0.010                        | 0.377                               | 0.326                             | 0.723                     | 0.215                 | <0.001                             | 0.644                              | 0.523                                                           | 0.682                                            |
|            | PFS | 0.240                        | 0.177                               | 0.115                             | 0.692                     | 0.366                 | 0.034                              | 0.281                              | 0.049                                                           | 0.483                                            |

**Supplementary Table S5:** Five-year survival rates are shown for disease-specific (DSS), overall survival (OS) and progression-free survival (PFS) for the whole TCGA cohort as well as for the MSI and CN-LOW subgroups.

|        |     | Grading |      | TB in 1 HPF |      | TB in 10 HPF |      | MCNS |      | TSR   |      | Inflammation |       | MELF |      | Lymphovascular space invasion |         | ITBCC grading scheme |       |      |
|--------|-----|---------|------|-------------|------|--------------|------|------|------|-------|------|--------------|-------|------|------|-------------------------------|---------|----------------------|-------|------|
|        |     | low     | high | low         | high | low          | high | low  | high | low   | high | low          | high  | low  | high | absent                        | present | Bd1                  | Bd2   | Bd3  |
| TCGA   | DSS | 97.5    | 76.5 | 95.4        | 35.3 | 94.9         | 36.2 | 67.2 | 95.2 | 53.3  | 93.7 | 93.3         | 50.0  | 95.3 | 81.6 | 95.0                          | 78.4    | 95.8                 | 93.8  | 52.8 |
|        | OS  | 92.7    | 72.8 | 91.1        | 30.3 | 91.2         | 27.1 | 60.0 | 91.2 | 49.5  | 89.3 | 89.0         | 45.0  | 89.2 | 81.6 | 89.5                          | 78.4    | 91.4                 | 91.8  | 45.2 |
|        | PFS | 84.4    | 65.0 | 82.8        | 27.3 | 82.0         | 29.3 | 59.4 | 81.7 | 65.6  | 79.8 | 79.4         | 75.0  | 81.2 | 80.9 | 82.2                          | 66.1    | 84.2                 | 74.8  | 45.1 |
| MSI    | DSS | 96.7    | 80.3 | 94.4        | 53.5 | 93.2         | 51.4 | 73.5 | 93.9 | 0.0   | 93.4 | 89.4         | 100.0 | 95.3 | 74.5 | 94.4                          | 71.1    | 96.6                 | 89.6  | 68.7 |
|        | OS  | 90.5    | 76.3 | 90.3        | 35.6 | 90.4         | 21.4 | 59.0 | 90.8 | 0.0   | 87.8 | 84.0         | 100.0 | 88.1 | 74.5 | 87.9                          | 71.1    | 92.0                 | 89.6  | 51.3 |
|        | PFS | 84.8    | 64.1 | 81.6        | 44.3 | 79.7         | 51.6 | 67.3 | 79.9 | 0.0   | 78.8 | 75.4         | 100.0 | 82.1 | 67.7 | 79.8                          | 65.1    | 82.8                 | 74.0  | 63.7 |
| CN-LOW | DSS | 98.0    | 72.2 | 96.2        | 50.0 | 96.3         | 50.0 | 66.7 | 96.1 | 100.0 | 94.0 | 96.4         | 0.0   | 95.4 | 87.5 | 95.4                          | 87.1    | 95.4                 | 100.0 | 50.0 |
|        | OS  | 93.9    | 67.7 | 91.7        | 50.0 | 91.8         | 50.0 | 66.7 | 91.4 | 87.5  | 90.5 | 92.8         | 0.0   | 89.9 | 87.5 | 90.5                          | 87.1    | 91.1                 | 95.5  | 50.0 |
|        | PFS | 83.6    | 66.5 | 83.4        | 37.5 | 83.5         | 37.5 | 58.3 | 82.6 | 100.0 | 80.4 | 82.1         | 0.0   | 80.1 | 91.7 | 83.5                          | 66.5    | 84.8                 | 76.0  | 40.0 |

**Supplementary Table S6:** Multivariate analysis including tumor budding and MELF pattern of invasion (disease-specific survival).

|                          | HR                   | p      |
|--------------------------|----------------------|--------|
| TB in 1 HPF high (low=1) | 12.19 (3.17 – 46.84) | <0.001 |
| MELF present (absent=1)  | 3.12 (0.82 – 11.84)  | 0.095  |

**Supplementary Table S7:** Results of multivariate analysis for the Munich validation cohort.

|     |                                  | HR                  | p            |
|-----|----------------------------------|---------------------|--------------|
| DSS | Age                              | 1.02 (0.96 - 1.07)  | 0.580        |
|     | FIGO stage 3/4 (1/2=1)           | 2.07 (1.09 - 3.92)  | <b>0.026</b> |
|     | Grading high grade (low grade=1) | 0.43 (0.11 - 1.75)  | 0.240        |
|     | LVSI present (absent=1)          | 0.63 (0.15 - 2.65)  | 0.530        |
|     | TB in 1 HPF high (low=1)         | 4.93 (1.15 - 21.2)  | <b>0.032</b> |
| OS  | Age                              | 1.05 (1.00 - 1.10)  | <b>0.035</b> |
|     | FIGO stage 3/4 (1/2=1)           | 1.87 (1.08 - 3.24)  | <b>0.026</b> |
|     | Grading high grade (low grade=1) | 0.62 (0.20 - 1.93)  | 0.410        |
|     | LVSI present (absent=1)          | 0.66 (0.19 - 2.23)  | 0.500        |
|     | TB in 1 HPF high (low=1)         | 4.57 (1.31 - 15.98) | <b>0.017</b> |
| PFS | Age                              | 0.96 (0.90 - 1.03)  | 0.298        |
|     | FIGO stage 3/4 (1/2=1)           | 2.06 (1.00 - 4.25)  | 0.050        |
|     | Grading high grade (low grade=1) | 0.80 (0.14 - 4.55)  | 0.798        |
|     | LVSI present (absent=1)          | 0.42 (0.07 - 2.43)  | 0.333        |
|     | TB in 1 HPF high (low=1)         | 9.45 (1.31 - 68.18) | <b>0.026</b> |

## Supplementary figures

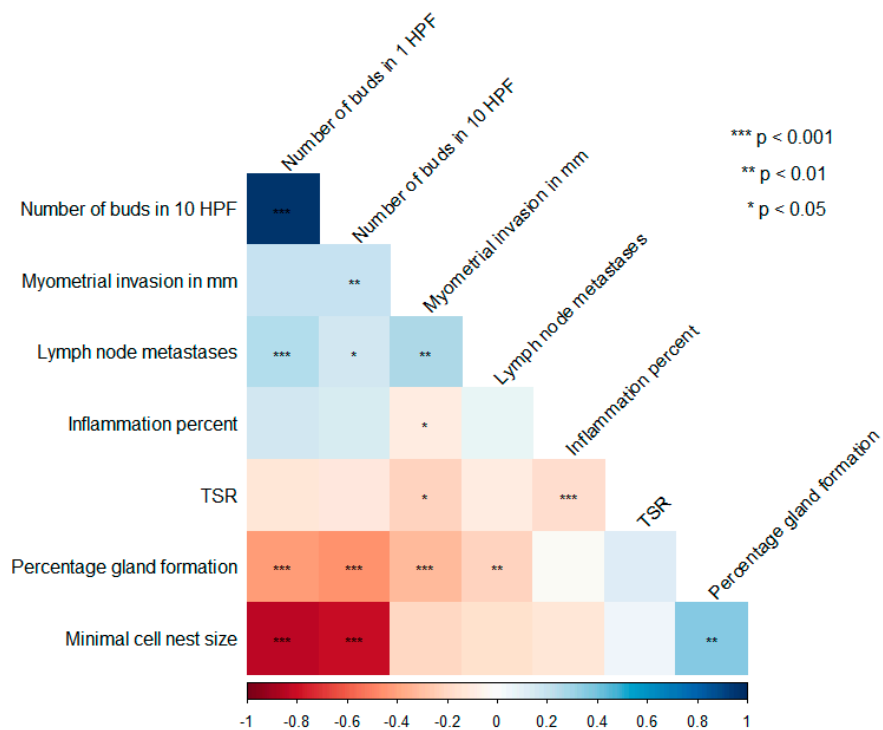

**Supplementary Figure S1:** Spearman correlations between histomorphological parameters analyzed (HPF: high-power field, TSR: tumor-stroma ratio).



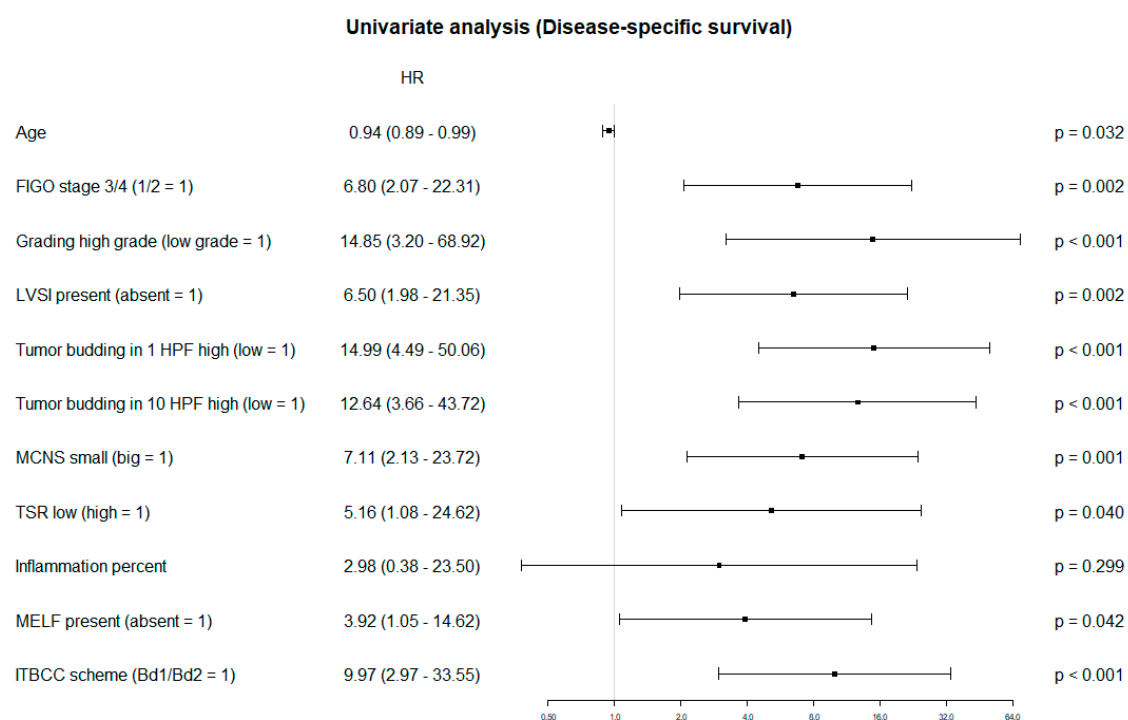

**Supplementary Figure S2:** Univariate survival analysis for disease-specific survival (whole TCGA cohort).

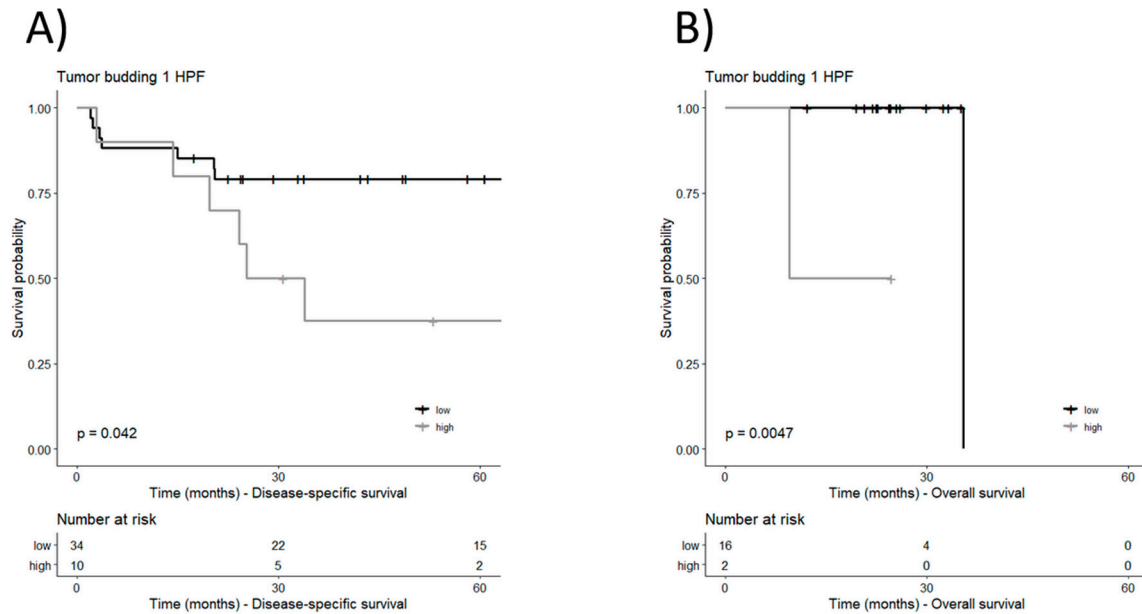

**Supplementary Figure S3:** Kaplan-Meier plots for tumor budding in 1 HPF for disease-specific survival (Munich validation cohort) (A) and for tumor budding in 1 HPF for overall survival (CPTAC validation cohort) (B).
